# Supplementary material for: Dual tumor suppressing and promoting function of Notch1 signaling in human prostate cancer
Source: PubMed Central journal article supplement (PMC5216996; doi:10.18632/oncotarget.10333), 2016-06-30
Supplement: oncotarget-07-48011-s001.pdf [file oncotarget-07-48011-s001.pdf]

## Dual tumor suppressing and promoting function of Notch1 signaling in human prostate cancer

### Supplementary Materials

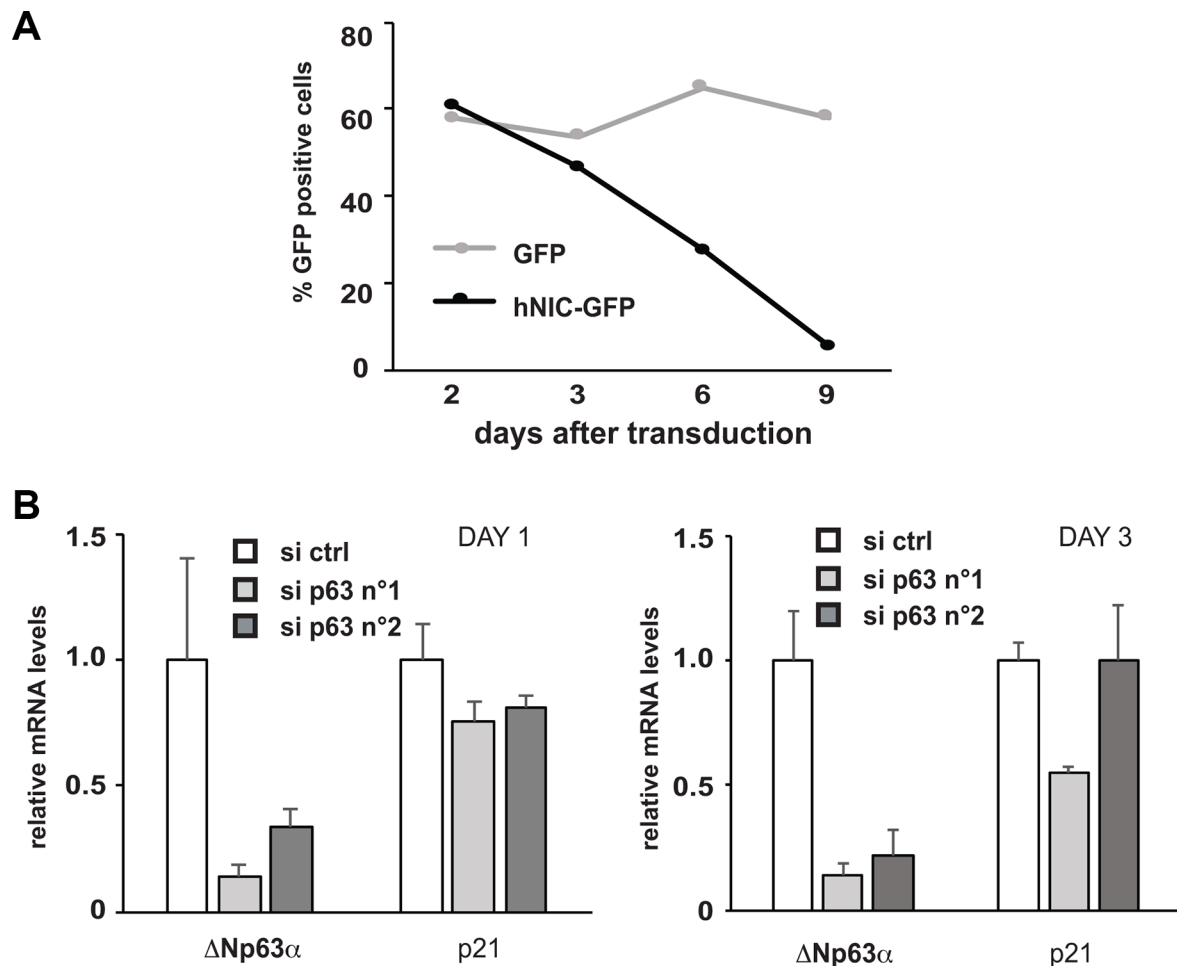

**Supplementary Figure S1: Effects of Notch1 overexpression and p63 silencing respectively on cell growth and p21<sup>WAF1/Cip1</sup> expression in PC3 cells.** (A) PC3 cells were infected with a retrovirus expressing the activated form of Notch 1 in parallel with GFP (hNIC-GFP) or a control virus expressing GFP alone (GFP). The percentage of retrovirally infected GFP-positive cells was determined by fluorescence microscopy at the indicated days until day 9. (B) PC3 cells were transfected with 2 different siRNA against DNp63α in parallel with control siRNA and RNA expression of DNp63α as well as of p21<sup>WAF1/Cip1</sup> was analyzed by real time RT-PCR (using 36β4 mRNA for normalization) 1 day (left panel) or 3 days after transfection (right panel).

### Supplementary Table S1: Genes up-regulated by Notch1 in LNCaP and/or PC3.

See Supplementary\_Table\_S1

**Supplementary Table S2: Genes that are induced or repressed by Notch1 in PC3 and/or LNCaP cells and that are concomitantly differentially expressed in prostate tumors according to Notch1 levels in at least 3 independent datasets.** See Supplementary\_Table\_S2

**Supplementary Table S3: Primers used for RT-QPCR reactions**

| Gene         | Forward primer (5'-3')   | Reverse primer (5'-3')       |
|--------------|--------------------------|------------------------------|
| 36β4         | TCACTGTGCCAGCTCAGAAC     | AATTTCAATGGTGCCTCTGG         |
| 18s          | GCAATTATCCCCATGAACG      | GGCCTCACTAAACCATCCAA         |
| β-actin      | GGACTTCGAGCAAGAGATGG     | AGGAAGGAAGGCTGGAAGAG         |
| HEY1         | TCTGAGCTGAGAAGGCTGGT     | GCGCGTCAAAGTAACCTTC          |
| NOTCH 1      | GAACCAATACAACCCTCTGC     | AGTCATCATCTGGGACAGG          |
| HES1         | GGTGCTGATAACAGCGGAAT     | TGAGCAAGTGCTGAGGGTTT         |
| P21WAF1/CIP1 | CCCAAGCTCTACCTTCCCAC     | ACAGGTCCACATGGTCTTCC         |
| ΔNP63A       | ATTGCATCACTGTATCATTTTCT  | TGCTCTGTGGGGACCTTTCA         |
| SMAD3        | TGAGTTCGCCTTCAATATGAAGAA | CAGGAGGTAGAACTGGTGTCTCTACTCT |
| EPAS1        | TTTGCAACTCCCTGGGTAAG     | TAGTTGGCCCAATGTGCTTT         |
| CXCL6        | TTGAAGAGTGTGGGGGAAAG     | CAATTGCCAAAGGGTTCAAT         |
